# Supplementary material for: Metallic Stent Mesh Coated with Silver Nanoparticles Suppresses Stent-Induced Tissue Hyperplasia and Biliary Sludge in the Rabbit Extrahepatic Bile Duct
Source: Pharmaceutics. 2020 Jun 17;12(6):563. doi: 10.3390/pharmaceutics12060563 (PMC7356520; doi:10.3390/pharmaceutics12060563)
Supplement: Supplementary file 1 [file pharmaceutics-12-00563-s001.pdf]

Supplementary Materials for

# Metallic Stent Mesh Coated with Silver Nanoparticles Suppresses Stent-Induced Tissue Hyperplasia and Biliary Sludge in the Rabbit Extrahepatic Bile Duct

**Table S1.** Characterization of AgNPs-coated SEMS.

| Groups   | Feed amount              |                                        | EDS analysis               |                        |
|----------|--------------------------|----------------------------------------|----------------------------|------------------------|
|          | PDA <sup>a</sup><br>(mg) | AgNO <sub>3</sub> <sup>b</sup><br>(mg) | Carbon <sup>c</sup><br>(%) | Ag <sup>d</sup><br>(%) |
| <b>A</b> | 0                        | 0                                      | 7                          | 0                      |
| <b>B</b> | 15                       | 45                                     | 28                         | 22                     |
| <b>C</b> | 15                       | 90                                     | 24                         | 34                     |
| <b>D</b> | 15                       | 180                                    | 20                         | 55                     |

<sup>a</sup> Weight of feed dopamine hydrochloride per SEMS in 15 mL of 5 mM Tris buffer; <sup>b</sup> Weight of feed AgNO<sub>3</sub> per SEMS in 15 mL of DW; <sup>c</sup> Percent of carbon in the total area, as determined by EDS mapping; <sup>d</sup> Percent of Ag in the total area, as determined by EDS mapping; Note. DW; deionized water, PDA; dopamine hydrochloride, SEMS; self-expandable metallic stent.

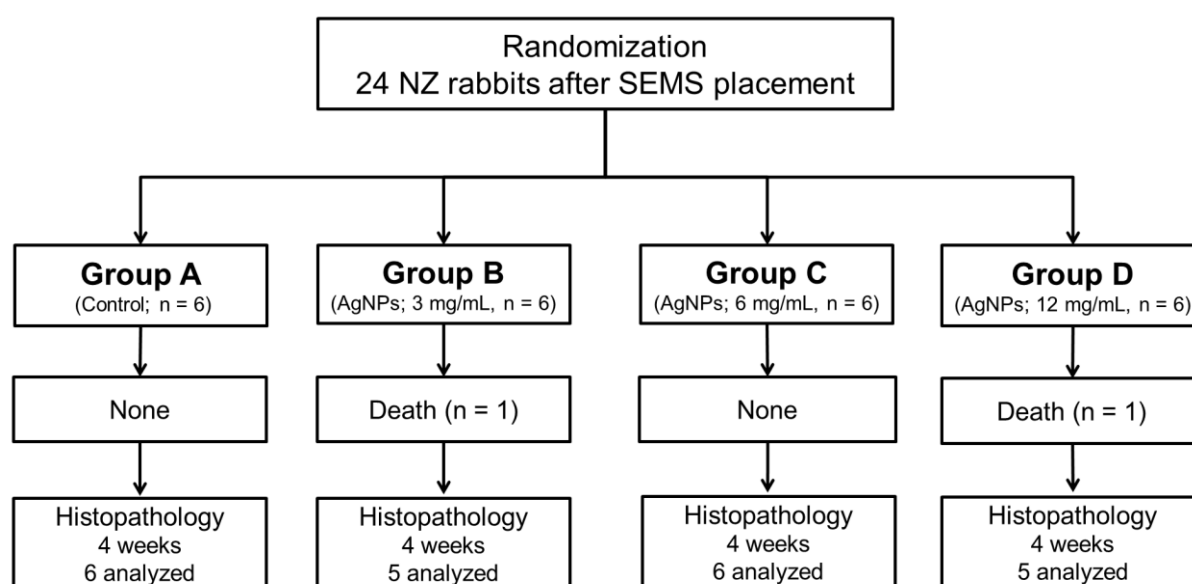

**Figure S1.** Flow diagram and study design showing the randomization process and follow-up. Note: NZ, New Zealand; SEMS, self-expandable metallic stent; AgNPs, Ag nanoparticles.

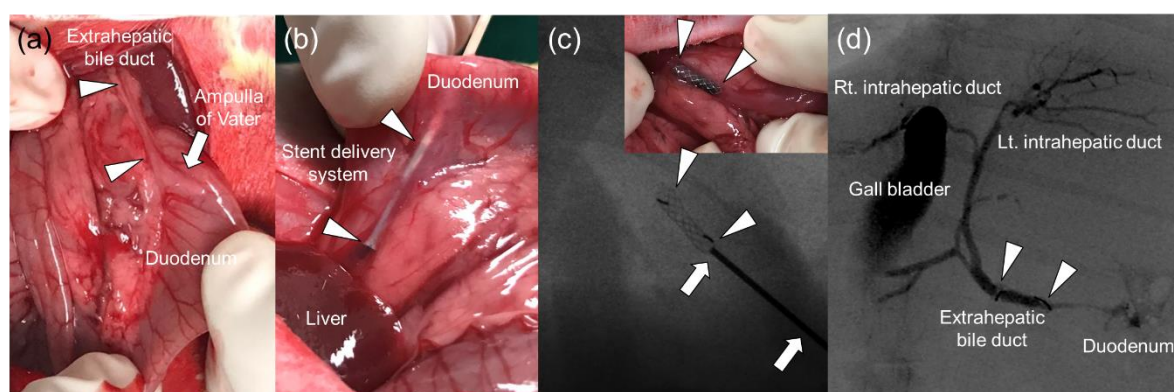

**Figure S2.** Photographic and radiographic images showing the technical steps involved in stent placement in the rabbit extrahepatic bile duct. (a) A photograph identifying the ampulla of Vater (arrow), the extrahepatic bile duct (arrowheads), and the duodenum. (b) Photograph obtained during stent placement showing a compressed stent (arrowheads), which was loaded in the angiocatheter and positioned in the extrahepatic bile duct. (c) Photograph and radiograph showing a placed stent (arrowheads) in the rabbit extrahepatic bile duct and a pusher rod (arrows). (d) Post-procedural cholangiography showing good passage of contrast medium through the stent (arrowheads) without any procedure-related complications.

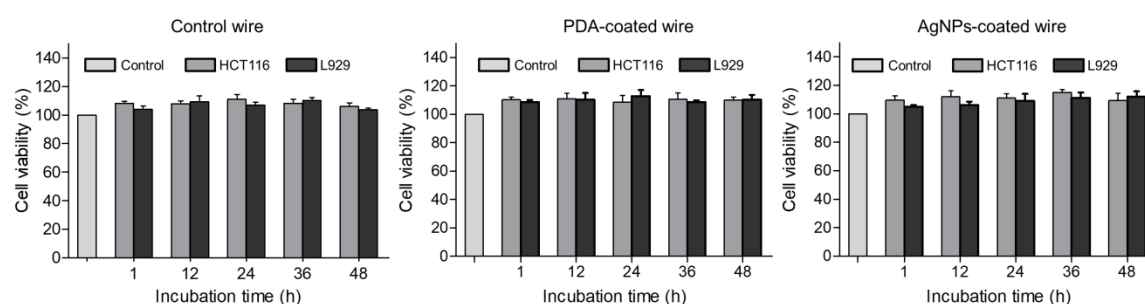

**Figure S3.** Cytotoxicity analysis of control nitinol wire, PDA-coated wire, and AgNPs-coated wire after incubation with L929 and 293 cells for different periods of time.
